# Supplementary material for: Deep Transfer Learning Techniques-Based Automated Classification and Detection of Pulmonary Fibrosis from Chest CT Images
Source: MDPI journal article supplement (doi:10.3390/pr11020443), 2023-02-01
Supplement: s1 [file s1]

Supplementary Table S1-S6 shows the results of Adam optimizer-based optimization of the learning rate of the six-transfer learning models for 50 epochs performed on 75% training and 15% validation data.

**Supplementary Table S1:** Adam optimizer-based optimization of learning rate of DenseNet121 model

| Number of Epoch | Training Loss   | Training accuracy | Validation loss | Validation Accuracy | Learning rate   |
|-----------------|-----------------|-------------------|-----------------|---------------------|-----------------|
| 1               | 0.096978        | 0.960133          | 0.192027        | 0.960938            | 0.001           |
| 2               | 0.008872        | 0.999169          | 2.503934        | 0.5625              | 0.001           |
| 3               | 0.005898        | 0.999169          | 1.89457         | 0.726563            | 0.001           |
| 4               | 0.005082        | 0.999169          | 2.583766        | 0.726563            | 0.0005          |
| 5               | 0.00539         | 0.999169          | 2.631716        | 0.734375            | 0.0005          |
| 6               | 0.005252        | 0.999169          | 2.902014        | 0.695313            | 0.00025         |
| 7               | 0.004748        | 0.999169          | 2.74256         | 0.71875             | 0.00025         |
| 8               | <b>0.005991</b> | <b>0.999169</b>   | <b>2.17531</b>  | <b>0.742188</b>     | <b>0.000125</b> |

The optimized learning rate of DenseNet121 model is **0.000125**

**Supplementary Table S2:** Adam optimizer-based optimization of learning rate of InceptionResNetv2 model

| Number of Epoch | Training Loss   | Training accuracy | Validation loss | Validation Accuracy | Learning rate    |
|-----------------|-----------------|-------------------|-----------------|---------------------|------------------|
| 1               | 0.131244        | 0.942691          | 0.149143        | 0.953125            | 0.001            |
| 2               | 0.027651        | 0.990864          | 50.97754        | 0.546875            | 0.001            |
| 3               | 0.00705         | 0.999169          | 0.159667        | 0.9375              | 0.001            |
| 4               | 0.00657         | 0.999169          | 0.039842        | 0.984375            | 0.0005           |
| 5               | 0.001165        | 1                 | 0.035429        | 0.992188            | 0.0005           |
| 6               | 0.005949        | 0.998339          | 0.075267        | 0.96875             | 0.0005           |
| 7               | 0.004269        | 0.999169          | 0.044188        | 0.992188            | 0.0005           |
| 8               | 0.005152        | 0.999169          | 0.056347        | 0.992188            | 0.00025          |
| 9               | 0.005617        | 0.999169          | 0.074104        | 0.921875            | 0.00025          |
| 10              | 0.004915        | 0.999169          | 0.092519        | 0.921875            | 0.000125         |
| 11              | 0.003462        | 0.999169          | 0.11532         | 0.914063            | 0.000125         |
| 12              | <b>0.004081</b> | <b>0.999169</b>   | <b>0.139653</b> | <b>0.914063</b>     | <b>0.0000625</b> |

The optimized learning rate of InceptionResNetv2 model is **0.0000625**

**Supplementary Table S3:** Adam optimizer-based optimization of learning rate of ResNet50v2 model

| Number of Epoch | Training Loss   | Training accuracy | Validation loss  | Validation Accuracy | Learning rate    |
|-----------------|-----------------|-------------------|------------------|---------------------|------------------|
| 1               | 0.131541        | 0.950166          | 229.5494         | 0.453125            | 0.001            |
| 2               | 0.027849        | 0.989203          | 3435.949         | 0.453125            | 0.001            |
| 3               | 0.027853        | 0.995017          | 309.3971         | 0.453125            | 0.001            |
| 4               | 0.011107        | 0.999169          | 32.38318         | 0.710938            | 0.0005           |
| 5               | 0.006463        | 0.999169          | 14.4573          | 0.875               | 0.0005           |
| 6               | 0.006302        | 0.999169          | 3.929239         | 0.90625             | 0.0005           |
| 7               | 0.004987        | 0.999169          | 0.982665         | 0.984375            | 0.0005           |
| 8               | 0.004974        | 0.999169          | 0.0299776        | 0.984375            | 0.0005           |
| 9               | 0.006605        | 0.999169          | 0.0236274        | 0.992188            | 0.0005           |
| 10              | 0.005552        | 0.999169          | 0.0134194        | 0.992188            | 0.0005           |
| 11              | 0.006594        | 0.999169          | 0.0067419        | 0.992188            | 0.0005           |
| 12              | 0.004956        | 0.999169          | 0.0068975        | 0.992188            | 0.0005           |
| 13              | 0.005129        | 0.999169          | 0.0058987        | 0.992188            | 0.0005           |
| 14              | 0.004522        | 0.999169          | 0.0040701        | 0.992188            | 0.0005           |
| 15              | 0.005327        | 0.999169          | 0.004242         | 0.992188            | 0.0005           |
| 16              | 0.004975        | 0.999169          | 0.0030118        | 0.992188            | 0.0005           |
| 17              | 0.005684        | 0.999169          | 0.0028614        | 0.992188            | 0.0005           |
| 18              | 0.004369        | 0.999169          | 0.0029249        | 0.992188            | 0.0005           |
| 19              | 0.006416        | 0.999169          | 0.0027669        | 0.992188            | 0.0005           |
| 20              | 0.005205        | 0.999169          | 0.0028357        | 0.992188            | 0.0005           |
| 21              | 0.004374        | 0.999169          | 0.0027854        | 0.992188            | 0.0005           |
| 22              | 0.006138        | 0.999178          | 0.0027806        | 0.992188            | 0.00025          |
| 23              | 0.005115        | 0.999169          | 0.028081         | 0.992188            | 0.00025          |
| 24              | 0.006047        | 0.999169          | 0.0068339        | 0.992188            | 0.000125         |
| 25              | 0.004947        | 0.999169          | 0.0067906        | 0.992188            | 0.000125         |
| 26              | <b>0.004283</b> | <b>0.999169</b>   | <b>0.0068291</b> | <b>0.992188</b>     | <b>0.0000625</b> |

The optimized learning rate of ResNet50v2 model is **0.0000625**

**Supplementary Table S4:** Adam optimizer-based optimization of learning rate of Inceptionv3 model

| Number of Epoch | Training Loss   | Training accuracy | Validation loss | Validation Accuracy | Learning rate   |
|-----------------|-----------------|-------------------|-----------------|---------------------|-----------------|
| 1               | 0.169212        | 0.933555          | 6.632735        | 0.453125            | 0.001           |
| 2               | 0.03088         | 0.999169          | 7.638783        | 0.453125            | 0.001           |
| 3               | 0.005334        | 0.999169          | 4.844649        | 0.453125            | 0.001           |
| 4               | 0.007747        | 0.999169          | 1.711046        | 0.640625            | 0.001           |
| 5               | 0.017656        | 0.996678          | 0.065251        | 0.976563            | 0.001           |
| 6               | 0.070755        | 0.980066          | 4.196708        | 0.664063            | 0.001           |
| 7               | 0.029651        | 0.994186          | 7.662934        | 0.484375            | 0.001           |
| 8               | 0.010275        | 0.998339          | 9.678524        | 0.414063            | 0.0005          |
| 9               | 0.007393        | 0.999169          | 5.429296        | 0.570313            | 0.0005          |
| 10              | 0.005824        | 0.999169          | 0.741854        | 0.882813            | 0.00025         |
| 11              | 0.006434        | 0.998339          | 0.586732        | 0.914063            | 0.00025         |
| 12              | <b>0.006391</b> | <b>0.998339</b>   | <b>0.651289</b> | <b>0.898438</b>     | <b>0.000125</b> |

The optimized learning rate of Inceptionv3 model is **0.0000625**

**Supplementary Table S5:** Adam optimizer-based optimization of learning rate of VGG19 model

| Number of Epoch | Training Loss   | Training accuracy | Validation loss | Validation Accuracy | Learning rate   |
|-----------------|-----------------|-------------------|-----------------|---------------------|-----------------|
| 1               | 1.88069         | 0.500831          | 0.641957        | 0.546875            | 0.001           |
| 2               | 0.421913        | 0.797342          | 0.266766        | 0.914063            | 0.001           |
| 3               | 0.429674        | 0.868771          | 0.372994        | 0.851563            | 0.001           |
| 4               | 0.71833         | 0.520764          | 0.730633        | 0.453125            | 0.001           |
| 5               | 0.702145        | 0.504153          | 0.701526        | 0.453125            | 0.0005          |
| 6               | 0.694811        | 0.490864          | 0.690554        | 0.765625            | 0.0005          |
| 7               | 0.689957        | 0.528239          | 0.695962        | 0.453125            | 0.00025         |
| 8               | 0.684258        | 0.536545          | 0.669463        | 0.445313            | 0.00025         |
| 9               | <b>0.669144</b> | <b>0.554817</b>   | <b>0.639826</b> | <b>0.796875</b>     | <b>0.000125</b> |

The optimized learning rate of VGG19 model is **0.000125**

**Supplementary Table S6:** Adam optimizer-based optimization of learning rate of Xception model

| Number of Epoch | Training Loss   | Training accuracy | Validation loss | Validation Accuracy | Learning rate   |
|-----------------|-----------------|-------------------|-----------------|---------------------|-----------------|
| 1               | 0.179083        | 0.932724          | 52.41513        | 0.453125            | 0.001           |
| 2               | 0.004911        | 0.999169          | 39.07822        | 0.453125            | 0.001           |
| 3               | 0.011271        | 0.997508          | 2.751696        | 0.867188            | 0.001           |
| 4               | 0.006999        | 0.999169          | 0.198542        | 0.976563            | 0.001           |
| 5               | 0.000972        | 1                 | 0.567571        | 0.914063            | 0.001           |
| 6               | 0.006233        | 0.999169          | 0.84649         | 0.914063            | 0.001           |
| 7               | 0.000523        | 1                 | 1.176231        | 0.914063            | 0.0005          |
| 8               | 0.006828        | 0.999169          | 1.183162        | 0.90625             | 0.0005          |
| 9               | 0.006104        | 0.999169          | 1.212053        | 0.890625            | 0.00025         |
| 10              | 0.006452        | 0.999169          | 1.211309        | 0.875               | 0.00025         |
| 11              | <b>0.005251</b> | <b>0.999169</b>   | <b>1.205872</b> | <b>0.875</b>        | <b>0.000125</b> |

The optimized learning rate of Xception model is **0.000125**
